# Supplementary material
Source: HighWire-hosted journal article supplement (https://cmaj.ca/highwire/filestream/59916/field_highwire_adjunct_files/0/151420-res-1-at.pdf)
Supplement: 151420-res-1-at.pdf [file 151420-res-1-at.pdf]

# APPENDIX 1 (AS SUPPLIED BY THE AUTHOR): OUTCOMES OF PATIENTS WITH CHRONIC OBSTRUCTIVE PULMONARY DISEASE (COPD) DIAGNOSED WITH OR WITHOUT PULMONARY FUNCTION TESTING — SUPPLEMENTARY MATERIALS

## Online Data Supplement Legend

### Supplemental Methods

### Supplemental Results

### Supplemental Discussion

### Supplemental Tables

**eTable 1.** Baseline characteristics of individuals with physician diagnosed COPD who did and did not receive pulmonary function testing in the peridiagnostic period, diagnosed with COPD in the ambulatory care or hospital setting (before propensity score matching)

### Supplemental Figures

**eFigure 1.** Study flow diagram.

## Supplemental Methods

To ensure the rigor of our results, a number of sensitivity analyses were conducted. First, the analysis was repeated using propensity score matching instead of propensity score adjustment.<sup>1</sup> Second, as a check that variables such as smoking, not available in the health administrative data, did not confound the results, a sensitivity analysis was performed using propensity score calibration.<sup>2</sup> In a representative sub-cohort of 1,229 people who also participated in the Canadian Community Health Survey (CCHS), which provided additional information on smoking status and exposure, body mass index, and self-reported health, a “gold standard” propensity score was calculated for each individual using both variables from the health administrative data and CCHS. This “gold standard” score was compared to their previous propensity score, using ordinary least squares regression, to obtain the relationship between the two scores. The resulting equation was then used to transform the propensity scores of all the individuals in the study (not just those with additional data) into “gold standard” scores. The primary analysis was then repeated, adjusting for the calibrated propensity scores. Third, the primary analysis was repeated in those aged 67 years and older in order to adjust for previous medication use (COPD or other), and exclude those previously prescribed a long-acting inhaled medication (an indication they may have had a unrecorded previous diagnosis of COPD). Fourth, we compared medication prescriptions one year before and after the ‘pulmonary function test date’ among those aged 67 years and older who had a pulmonary function test (cases) and those who did not (controls), in the matched cohort. For the cases, the ‘pulmonary function test date’ was the date on which they received their pulmonary function test. However, as the controls, by definition, were those who did not receive a pulmonary function test, we had to assign them a ‘pulmonary function test date’ equivalent. To do this we calculated the number of days prior to the study index date that each case received pulmonary function testing. We then counted back the same number of days from that case’s matched control’s index date, and considered this the ‘pulmonary function test date’ equivalent for that control. Fifth, we determined whether it was plausible that an unmeasured confounder or misclassification error could be responsible for the observed results. We varied the hazard ratio of a theoretical, unmeasured confounder and the imbalance of this confounder between the study cohorts to see at what point the observed hazard ratio was rendered null.<sup>3</sup> The same approach was used to estimate the effects of misclassification due to the case definition.

## Supplemental Results

### Impact of a potential unmeasured confounder and potential misclassification

A potential unmeasured confounder, uncorrelated with any of the covariates, with only a moderate impact on the risk of COPD hospitalization or death from any cause that was moderately more common in the non-tested group might negate the significant association observed in our primary analysis. Likewise, misclassification might explain our primary findings. However, only in the extreme and unlikely scenarios where an unmeasured confounder had a 90% difference between the groups or increased the risk of COPD hospitalization or death from any cause by 50% and had no correlation with any of the other variables adjusted for would the results in those ambulatory in the peridiagnostic period be negated. An equally extreme and clinically unlikely scenario would also have to exist to allow for misclassification to account for the results observed.

## Supplemental Discussion

We posit that pulmonary function testing improves patient outcomes by offering important clinical information. We hypothesize that in most patients with suspected COPD, pulmonary function testing confirms the diagnosis and reveals the severity of disease, leading to the appropriate use of COPD medications and other interventions to improve COPD specific and all cause health outcomes. Our observation that inhaled long-acting bronchodilators, which represent first-line therapy in COPD but are contraindicated in asthma without the addition of inhaled steroids, were prescribed more often when peridiagnostic pulmonary function tests were done supports the above hypothesis. We also hypothesize that in a minority of patients with suspected COPD, pulmonary function testing rules out COPD, which helps avoid the use of unnecessary COPD medications (with their side effects), and triggers a search for and subsequent diagnosis and treatment of patients’ true disease. This leads to an improvement in all cause health outcomes.

We acknowledge that a well-designed randomized clinical trial would most definitively establish the true merit of pulmonary function testing. However, such a trial is not likely to occur because testing has other benefits, such as predicting prognosis, leaving little equipoise to ethically allow for a control group that does not receive testing. In addition, because such a trial would need to capture patients with COPD at the time of diagnosis and follow them for years, the resources needed to conduct such a trial would be prohibitive. Unfortunately, without evidence of a benefit, there are still physicians who continue to not order pulmonary function

testing to diagnose COPD making our observational study, with its acknowledged and quantifiable limitations, a critical addition to the scientific literature.

## Supplemental Tables

**eTable 1.** Baseline characteristics of individuals with physician diagnosed COPD who did and did not receive pulmonary function testing in the peridiagnostic period diagnosed with COPD in the ambulatory care or hospital setting (before propensity score matching)

| Characteristic                                    | Ambulatory Care setting                               |               |                            |                      | Hospital Setting                                       |               |                            |                      |
|---------------------------------------------------|-------------------------------------------------------|---------------|----------------------------|----------------------|--------------------------------------------------------|---------------|----------------------------|----------------------|
|                                                   | Pulmonary Function Testing In Peridiagnostic Period % |               | Standardized Difference, % | P Value <sup>a</sup> | Pulmonary Function Testing In Peridiagnostic Period, % |               | Standardized Difference, % | P Value <sup>a</sup> |
|                                                   | Yes                                                   | No            |                            |                      | Yes                                                    | No            |                            |                      |
| <b>Patients, n</b>                                | 20,023                                                | 17,700        |                            |                      | 8,363                                                  | 22,812        |                            |                      |
| <b>Demographic Characteristics</b>                |                                                       |               |                            |                      |                                                        |               |                            |                      |
| Mean age, years (SD)                              | 65.67 ± 11.36                                         | 67.54 ± 13.72 | 0.15                       | <.001                | 69.72 ± 11.43                                          | 72.38 ± 12.59 | 0.22                       | <.001                |
| Women, %                                          | 47.7                                                  | 49.8          | 0.04                       | <.001                | 46.7                                                   | 49.0          | 0.05                       | <.001                |
| Income Quintile, %                                |                                                       |               |                            | <.001                |                                                        |               |                            | 0.017                |
| Quintile 1 (lowest)                               | 21.8                                                  | 25.0          | 0.08                       |                      | 24.6                                                   | 26.2          | 0.04                       |                      |
| Quintile 2                                        | 21.4                                                  | 22.5          | 0.03                       |                      | 21.7                                                   | 22.1          | 0.01                       |                      |
| Quintile 3                                        | 19.9                                                  | 19.3          | 0.01                       |                      | 19.5                                                   | 19.2          | 0.01                       |                      |
| Quintile 4                                        | 19.0                                                  | 17.3          | 0.04                       |                      | 18.0                                                   | 17.5          | 0.01                       |                      |
| Quintile 5 (highest)                              | 17.9                                                  | 15.8          | 0.06                       |                      | 16.2                                                   | 15.1          | 0.03                       |                      |
| Rural (versus urban) residence, %                 | 12.6                                                  | 16.4          | 0.11                       | <.001                | 14.2                                                   | 19.1          | 0.13                       | <.001                |
| Region of Province                                |                                                       |               |                            | <.001                |                                                        |               |                            | <.001                |
| Region 1                                          | 7.0                                                   | 7.7           | 0.03                       |                      | 7.4                                                    | 7.8           | 0.01                       |                      |
| Region 2                                          | 6.9                                                   | 9.4           | 0.09                       |                      | 6.3                                                    | 8.4           | 0.08                       |                      |
| Region 3                                          | 4.8                                                   | 4.2           | 0.03                       |                      | 5.7                                                    | 5.1           | 0.02                       |                      |
| Region 4                                          | 14.6                                                  | 11.9          | 0.08                       |                      | 17.0                                                   | 12.0          | 0.14                       |                      |
| Region 5                                          | 3.9                                                   | 3.7           | 0.01                       |                      | 3.7                                                    | 3.0           | 0.04                       |                      |
| Region 6                                          | 6.9                                                   | 5.5           | 0.06                       |                      | 6.8                                                    | 5.7           | 0.05                       |                      |
| Region 7                                          | 9.2                                                   | 8.6           | 0.02                       |                      | 6.9                                                    | 6.6           | 0.01                       |                      |
| Region 8                                          | 10.6                                                  | 8.3           | 0.08                       |                      | 8.4                                                    | 7.1           | 0.05                       |                      |
| Region 9                                          | 12.5                                                  | 11.5          | 0.03                       |                      | 10.7                                                   | 12.9          | 0.07                       |                      |
| Region 10                                         | 4.6                                                   | 5.7           | 0.05                       |                      | 4.5                                                    | 5.1           | 0.03                       |                      |
| Region 11                                         | 9.0                                                   | 9.3           | 0.01                       |                      | 8.3                                                    | 9.6           | 0.05                       |                      |
| Region 12                                         | 3.4                                                   | 4.0           | 0.03                       |                      | 4.1                                                    | 4.9           | 0.04                       |                      |
| Region 13                                         | 5.0                                                   | 8.5           | 0.14                       |                      | 7.3                                                    | 8.8           | 0.06                       |                      |
| Region 14                                         | 1.6                                                   | 1.6           | 0.01                       |                      | 3.1                                                    | 3.1           | 0.00                       |                      |
| Immigrant, %                                      | 7.6                                                   | 7.7           | 0.00                       | 0.76                 | 6.5                                                    | 5.5           | 0.04                       | 0.001                |
| Index year, %                                     |                                                       |               |                            |                      |                                                        |               |                            |                      |
| 2005                                              | 3.7                                                   | 6.2           | 0.12                       | <.001                | 7.0                                                    | 12.2          | 0.18                       | <.001                |
| 2006                                              | 15.9                                                  | 17.1          | 0.03                       |                      | 19.1                                                   | 22.3          | 0.08                       |                      |
| 2007                                              | 21.4                                                  | 20.7          | 0.02                       |                      | 22.7                                                   | 20.9          | 0.04                       |                      |
| 2008                                              | 22.1                                                  | 21.4          | 0.02                       |                      | 22.3                                                   | 21.6          | 0.02                       |                      |
| 2009                                              | 21.7                                                  | 22.1          | 0.01                       |                      | 22.9                                                   | 20.8          | 0.05                       |                      |
| 2010                                              | 12.5                                                  | 9.9           | 0.08                       |                      | 4.8                                                    | 1.8           | 0.17                       |                      |
| 2011                                              | 2.8                                                   | 2.6           | 0.01                       |                      | 1.2                                                    | 0.4           | 0.10                       |                      |
| Living in Long Term Care, %                       | 0.5                                                   | 6.3           | 0.32                       | <.001                | 1.9                                                    | 9.1           | 0.32                       | <.001                |
| <b>COPD Related Characteristics, %</b>            |                                                       |               |                            |                      |                                                        |               |                            |                      |
| Spirometry prior to peridiagnostic period         |                                                       |               |                            |                      |                                                        |               |                            |                      |
| Up to 1 year before                               | 13.1                                                  | 5.1           | 0.28                       | <.001                | 14.2                                                   | 5.3           | 0.30                       | <.001                |
| More than 1 to 2 years before                     | 5.6                                                   | 3.6           | 0.10                       |                      | 5.6                                                    | 4.0           | 0.08                       |                      |
| More than 2 to 5 years before                     | 10.1                                                  | 7.1           | 0.11                       |                      | 10.6                                                   | 8.5           | 0.07                       |                      |
| More than 5 years before or never                 | 71.1                                                  | 84.2          | 0.32                       |                      | 69.6                                                   | 82.3          | 0.30                       |                      |
| Pulmonologist visit in previous year <sup>b</sup> | 29.1                                                  | 3.1           | 0.76                       | <.001                | 21.4                                                   | 2.8           | 0.59                       | <.001                |

|                                                                                                    |          |          |      |       |          |          |      |       |
|----------------------------------------------------------------------------------------------------|----------|----------|------|-------|----------|----------|------|-------|
| Internal medicine or geriatrics specialist visit                                                   | 48.5     | 29.1     | 0.40 | <.001 | 56.9     | 39.8     | 0.35 | <.001 |
| Long term oxygen therapy                                                                           | 2.7      | 1.3      | 0.10 | <.001 | 3.4      | 1.6      | 0.11 | <.001 |
| <b>General Health Characteristics</b>                                                              |          |          |      |       |          |          |      |       |
| Median primary care physician visits in previous year, ( <i>interquartile range</i> ) <sup>b</sup> | 7 (4-11) | 7 (4-11) | 0.01 | 0.619 | 7 (4-11) | 6 (3-11) | 0.11 | <.001 |
| Influenza vaccination, %                                                                           | 48.7     | 43.2     | 0.11 | <.001 | 48.2     | 42.6     | 0.11 | <.001 |
| <b>Previous or Coexisting Medical</b>                                                              |          |          |      |       |          |          |      |       |
| Asthma                                                                                             | 30.1     | 20.1     | 0.23 | <.001 | 27.8     | 19.5     | 0.20 | <.001 |
| Other chronic respiratory disease                                                                  | 17.7     | 8.6      | 0.27 | <.001 | 17.1     | 8.0      | 0.28 | <.001 |
| Lung cancer                                                                                        | 5.9      | 2.9      | 0.15 | <.001 | 16.1     | 4.9      | 0.37 | <.001 |
| Pulmonary embolism                                                                                 | 2.1      | 2.3      | 0.01 | 0.235 | 4.3      | 3.4      | 0.05 | <.001 |
| Cor pulmonale                                                                                      | 0.1      | 0        | 0.03 | 0.016 | 0.1      | 0.1      | 0.02 | 0.036 |
| Acute myocardial infarction                                                                        | 25.2     | 25.6     | 0.01 | 0.341 | 42.3     | 40.6     | 0.03 | 0.01  |
| Other ischemic heart disease                                                                       | 20.5     | 19.5     | 0.02 | 0.024 | 34.9     | 32.4     | 0.05 | <.001 |
| Congestive heart failure                                                                           | 13.5     | 16.8     | 0.09 | <.001 | 34.2     | 33.9     | 0.01 | 0.663 |
| Dementia                                                                                           | 4.1      | 12       | 0.29 | <.001 | 8.6      | 17.8     | 0.28 | <.001 |
| Arrhythmias                                                                                        | 17.1     | 19       | 0.05 | <.001 | 31.9     | 30.1     | 0.04 | 0.002 |
| Cerebrovascular disease                                                                            | 8.9      | 13.9     | 0.16 | <.001 | 16.0     | 20.4     | 0.11 | <.001 |
| End stage renal disease                                                                            | 1.0      | 1.5      | 0.05 | <.001 | 3.0      | 3.4      | 0.02 | 0.068 |
| Diabetes                                                                                           | 20.3     | 22.5     | 0.05 | <.001 | 33.9     | 34.9     | 0.02 | 0.116 |
| Hypertension                                                                                       | 56.6     | 58.9     | 0.04 | <.001 | 73.0     | 74.5     | 0.03 | 0.007 |
| Non-lung cancer                                                                                    | 17.6     | 17.4     | 0.00 | 0.705 | 25.2     | 23.3     | 0.04 | <.001 |
| Osteoporosis                                                                                       | 2.0      | 3.5      | 0.09 | <.001 | 2.8      | 4.8      | 0.10 | <.001 |
| Psychiatric disease                                                                                |          |          |      |       |          |          |      |       |
| Requiring hospitalization                                                                          | 0.6      | 1.5      | 0.09 | <.001 | 1.1      | 1.9      | 0.07 | <.001 |
| Requiring ambulatory care visits                                                                   |          |          |      |       |          |          |      |       |
| none                                                                                               | 90.6     | 89.5     | 0.04 |       | 88.5     | 88.3     | 0.00 |       |
| Palliative                                                                                         | 0.6      | 1.3      | 0.07 | <.001 | 2.6      | 2.7      | 0.00 | 0.837 |
| Overall level of comorbidity <sup>c</sup>                                                          |          |          |      |       |          |          |      |       |
| High                                                                                               | 27.7     | 25.2     | 0.06 | <.001 | 36.8     | 30.9     | 0.13 | <.001 |
| Medium                                                                                             | 43.7     | 39.9     | 0.08 |       | 42.4     | 40.8     | 0.03 |       |
| Low                                                                                                | 28.6     | 34.9     | 0.13 |       | 20.7     | 28.3     | 0.18 |       |
| <b>Recent Acute Events, %</b>                                                                      |          |          |      |       |          |          |      |       |
| Most recent hospitalization for acute bronchitis, pneumonia or influenza                           |          |          |      |       |          |          |      |       |
| In the past 6 months                                                                               | 1.8      | 2.8      | 0.07 | <.001 | 3.7      | 3.6      | 0.01 | 0.002 |
| > 6 months before index date                                                                       | 3.8      | 4.2      | 0.02 |       | 6.5      | 7.7      | 0.05 |       |
| Never                                                                                              | 94.3     | 93       | 0.05 |       | 89.8     | 88.7     | 0.03 |       |
| Most recent hospitalization for asthma                                                             |          |          |      |       |          |          |      |       |
| In the past 6 months                                                                               | 0.4      | 0.2      | 0.05 | <.001 | 0.7      | 0.2      | 0.07 |       |
| > 6 months before index date                                                                       | 0.8      | 0.5      | 0.04 |       | 1.6      | 0.9      | 0.06 |       |
| Never                                                                                              | 98.8     | 99.3     | 0.06 |       | 97.7     | 98.9     | 0.09 |       |
| Most recent hospitalization for other respiratory disease                                          |          |          |      |       |          |          |      | <.001 |
| In the past 6 months                                                                               | 1.5      | 1.5      | 0.00 | <.001 | 1.8      | 1.0      | 0.06 |       |
| >6 months before index date                                                                        | 2.1      | 1.2      | 0.07 |       | 2.5      | 1.8      | 0.05 |       |
| Never                                                                                              | 96.3     | 97.3     | 0.06 |       | 95.7     | 97.2     | 0.08 |       |

|                                                                                     |               |               |      |       |               |               |      |  |       |
|-------------------------------------------------------------------------------------|---------------|---------------|------|-------|---------------|---------------|------|--|-------|
| Most recent hospitalization for other causes                                        |               |               |      |       |               |               |      |  | <.001 |
| In the past 6 months                                                                | 7.7           | 11.5          | 0.13 | <.001 | 21.0          | 20.6          | 0.01 |  |       |
| > 6 months before index date                                                        | 27.1          | 28.1          | 0.02 |       | 32.6          | 36.7          | 0.09 |  |       |
| Never                                                                               | 65.2          | 60.4          | 0.10 |       | 46.4          | 42.6          | 0.08 |  |       |
| Most recent emergency department visit for acute bronchitis, pneumonia or influenza |               |               |      |       |               |               |      |  | 0.04  |
| In the past 6 months                                                                | 3.2           | 3.7           | 0.03 | 0.002 | 4.5           | 4.1           | 0.02 |  |       |
| >6 months before index date                                                         | 8.2           | 7.5           | 0.02 |       | 8.4           | 7.7           | 0.03 |  |       |
| Never                                                                               | 88.6          | 88.8          | 0.00 |       | 87.1          | 88.2          | 0.03 |  |       |
| Most recent emergency department visit for asthma                                   |               |               |      |       |               |               |      |  | <.001 |
| In the past 6 months                                                                | 1.4           | 1.0           | 0.03 | <.001 | 1.7           | 0.8           | 0.07 |  |       |
| >6 months before index date                                                         | 2.9           | 2.0           | 0.06 |       | 2.8           | 1.9           | 0.06 |  |       |
| Never                                                                               | 95.8          | 97            | 0.06 |       | 95.6          | 97.3          | 0.09 |  |       |
| Most recent emergency department visit for other respiratory disease                |               |               |      |       |               |               |      |  | <.001 |
| In the past 6 months                                                                | 0.6           | 0.5           | 0.01 | <.001 | 0.7           | 0.4           | 0.04 |  | <.001 |
| >6 months before index date                                                         | 0.7           | 0.4           | 0.04 |       | 0.8           | 0.5           | 0.05 |  |       |
| Never                                                                               | 98.8          | 99.2          | 0.04 |       | 98.5          | 99.1          | 0.06 |  |       |
| Most recent emergency department visit for other causes                             |               |               |      |       |               |               |      |  | 0.014 |
| In the past 6 months                                                                | 19.8          | 22.2          | 0.06 | <.001 | 30.7          | 30.9          | 0.00 |  |       |
| >6 months before index date                                                         | 44            | 43.1          | 0.02 |       | 40.5          | 41.9          | 0.03 |  |       |
| Never                                                                               | 36.2          | 34.6          | 0.03 |       | 28.8          | 27.2          | 0.04 |  |       |
| <b>Primary Care Physician Characteristics</b>                                       |               |               |      |       |               |               |      |  |       |
| Mean age, years ± SD                                                                | 52.75 ± 10.33 | 54.00 ± 10.23 | 0.12 | <.001 | 53.14 ± 10.33 | 53.30 ± 10.22 | 0.02 |  | 0.232 |
| Women, %                                                                            | 24.0          | 18.3          | 0.14 | <.001 | 22.2          | 19.1          | 0.07 |  | <.001 |
| Graduated from a Canadian Medical School,                                           | 75.2          | 74.6          | 0.01 | 0.173 | 76.5          | 77.0          | 0.01 |  | 0.338 |
| Median Continuity of Care Index,<br>(interquartile range) <sup>d</sup>              | 1 (1-1)       | 1 (0-1)       | 0.03 | 0.014 | 1 (1-1)       | 1 (0-1)       | 0.01 |  | 0.679 |
| <b>Quality of Care Measures, %</b>                                                  |               |               |      |       |               |               |      |  |       |
| Glucose testing in previous 3 years                                                 | 89.4          | 83.6          | 0.17 | <.001 | 87.3          | 83.3          | 0.11 |  | <.001 |
| Cholesterol testing in previous 3 years                                             | 80.9          | 70.8          | 0.25 | <.001 | 75.8          | 67.5          | 0.18 |  | <.001 |

COPD, chronic obstructive pulmonary disease

<sup>a</sup> Testing the hypothesis of no difference between the groups with and without pulmonary function testing.

<sup>b</sup> In Ontario, primary care is provided by family and general physicians, and specialist COPD care is usually provided by pulmonologists, general internists, or geriatricians.

<sup>c</sup> As indicated by Johns Hopkins Collapsed Ambulatory Diagnostic Groups.

<sup>d</sup> A measure of patients' access to ambulatory care through the same care provider over time, calculated using the Bice method.<sup>3,4</sup>

## Supplemental Figures

eFigure 1. Study flow diagram.

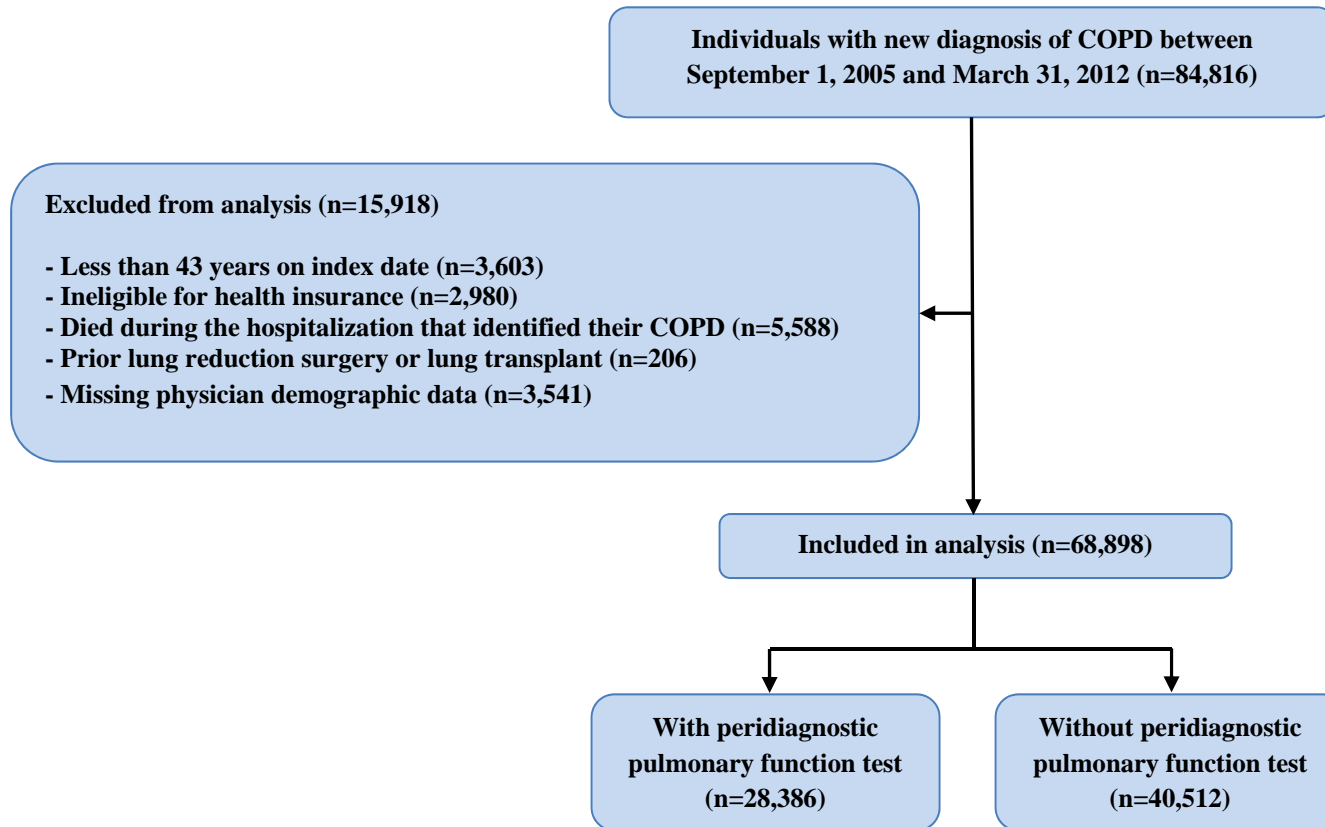

COPD = chronic obstructive pulmonary disease



## References

- (1) D'Agostino RB, Jr. Propensity score methods for bias reduction in the comparison of a treatment to a non-randomized control group. *Stat Med* 1998;17:2265-2281.
- (2) Sturmer T, Schneeweiss S, Avorn J, Glynn RJ. Adjusting effect estimates for unmeasured confounding with validation data using propensity score calibration. *Am J Epidemiol* 2005;162:279-289.
- (3) Reid RJ, MacWilliam L, Verhulst L, Roos N, Atkinson M. Performance of the ACG case-mix system in two Canadian provinces. *Med Care* 2001;39:86-99.
- (4) Bice TW, Boxerman SB. A quantitative measure of continuity of care. *Medical Care* 1977;15:347-9.
